# Supplementary material
Source: publisher figshare collection journal article supplement (https://geolsoc.figshare.com/ndownloader/files/27599796)
Supplement: Supplementary file 1 [file 27599796]

## Sheet: Sheet1
Sample ID	Zircon	Tourmaline	Garnet	Titanite	Kyanite	Staurolite	CPX	TiO2	CrSpinel	Apatite	Monazite	Sphalerite	Number of grains
NC10	12.2996	10.4748	3.29387	0	0	0.845775	0.00754034	66.9507	0.761574	3.7287	0.730156	0.907354	1559.36
NC11	11.4075	10.6751	2.53744	0.0036739	0	0.127362	0.00612317	67.1259	0.477608	5.15326	0.743353	1.74266	1316.89
NC13	7.03988	13.0586	2.01826	0	0	0.949063	0	31.5714	1.08121	43.1764	0.336377	0.768861	177.695
NC14	10.4043	12.59	11.5159	0.0249802	0	0.595362	0.0124901	57.5836	2.91852	2.38561	1.75278	0.216495	471.55
NC15	7.32889	27.52	11.64	0.191111	0	0.00444444	0.00888889	33.04	0.635556	18.2444	1.22222	0.164444	414.25
NC16	3.68717	30.5175	7.27872	0	0	0.159388	0.48879	19.9766	0.0106259	27.6379	1.53012	8.71321	211.219
NC22	10.1485	3.97297	1.34877	0.222612	1.59495	0.591886	0	43.0139	0.206898	38.2133	0.599743	0.0864259	779.714
NC23	3.43527	23.5746	2.62324	0.0403133	0.0287952	0.932965	0.123819	49.3924	0.431928	18.7572	0.371458	0.287952	831.494
NC24	5.67106	23.9786	3.34115	0.234609	0	2.86385	1.90923	38.6457	0.388318	21.4384	0.622927	0.906076	300.714
NC25	3.59704	11.0442	5.94083	0.373561	0	0.831476	0.0361511	34.3315	0.319335	42.2848	0.494065	0.747123	314.169
NC9	10.1304	14.802	3.13461	0.00465766	0	1.54867	0.121099	24.5482	0.188635	44.8719	0.183978	0.465766	822.516
SG10	0.348481	2.10972	7.91147	0	0	0	0	0.800565	0	88.2552	0.381446	0.193077	509.118
SG11	0.834532	28.0576	18.0719	0	0	0	0	14.3309	0.604317	31.4101	0.0431655	6.64748	137.354
SG12	6.17447	15.2458	12.3903	1.67191	1.72157	2.05264	0	28.9604	0.264857	29.5729	1.23324	0.711803	228.786
SG13	10.2976	27.3013	3.75487	0.00627904	0	0	0.0816275	40.167	0.822554	14.5234	2.6372	0.408138	473.781
SG15	9.77675	25.1048	6.28689	0.564537	0	1.66795	0	43.2298	1.16329	10.3071	0.932341	0.966555	188.046
SG16	3.1197	9.38885	1.74572	0	0	0.136803	2.38513	13.6357	0.151673	68.3628	0.249814	0.823792	623.66
SG5	23.7772	13.982	2.69321	0.00485932	0.000285843	0.0020009	0	47.2683	3.13598	6.97056	1.96917	0.196374	7993.26
SG7	0.404464	22.7623	49.412	0	0	0.629166	0	8.35143	0.0599206	16.4931	0.172272	1.71523	287.471
SG8	0.495817	60.5516	9.38953	0	0.020659	0	0.0103295	3.77027	0.578453	24.1297	0.268567	0.785043	267.744
SG9	0.702165	47.6107	8.59177	0	0	0	0.380339	12.0636	0.00975229	23.3275	1.22879	6.08543	284.838
